# Supplementary material for: Impact of Single Amino Acid Substitutions in Parkinsonism-Associated Deglycase-PARK7 and Their Association with Parkinson’s Disease
Source: MDPI journal article supplement (doi:10.3390/jpm12020220), 2022-02-05
Supplement: s1 [file s1]

## Supplementary Tables

# Impact of single amino acid substitutions in parkinsonism associated deglycase-PARK7 and their association with Parkinson's disease

Farah Anjum<sup>1</sup>, Namrata Joshia<sup>2</sup>, Taj Mohammad<sup>3</sup>, Alaa Shafie<sup>1</sup>, Fahad A. Alhumaydhi<sup>4</sup>, Mohammad A. Aljasir<sup>4</sup>, Moyad J.S. Shahwan<sup>5</sup>, Bekhzod Abdullaev<sup>6</sup>, Mohd Adnan<sup>7</sup>, Abdelbaset Mohamed Elasbali<sup>8</sup>, Visweswara Rao Pasupuleti<sup>9,10,11,\*</sup>, Md Imtaiyaz Hassan<sup>3,\*</sup>

<sup>1</sup>Department of Clinical Laboratory Sciences, College of Applied Medical Sciences, Taif University, P.O. Box 11099, Taif 21944, Saudi Arabia. [f2016anjum@gmail.com](mailto:f2016anjum@gmail.com) (F.A.); [dr.alaa.shafie.tu@gmail.com](mailto:dr.alaa.shafie.tu@gmail.com) (A.S.)

<sup>2</sup>Department of Computer Science, Jamia Millia Islamia, Jamia Nagar, New Delhi 110025, INDIA. [namrata8750451546@gmail.com](mailto:namrata8750451546@gmail.com) (N.J.)

<sup>3</sup>Centre for Interdisciplinary Research in Basic Sciences, Jamia Millia Islamia, Jamia Nagar, New Delhi 110025, INDIA. [taj144796@st.jmi.ac.in](mailto:taj144796@st.jmi.ac.in) (T.M.)

<sup>4</sup>Department of Medical Laboratories, College of Applied Medical Sciences, Qassim University, Buraydah, Saudi Arabia. [f.alhumaydhi@qu.edu.sa](mailto:f.alhumaydhi@qu.edu.sa) (F.A.A.); [Mjasr@qu.edu.sa](mailto:Mjasr@qu.edu.sa) (M.A.A.)

<sup>5</sup>College of Pharmacy & Health sciences, Ajman University, Ajman, UAE. [m.shahwan@ajman.ac.ae](mailto:m.shahwan@ajman.ac.ae) (M.J.S.S.)

<sup>6</sup>Scientific Department, Akfa University, Tashkent, Uzbekistan. [b.abdullaev@akfauniversity.org](mailto:b.abdullaev@akfauniversity.org) (B.A.)

<sup>7</sup>Department of Biology, College of Science, University of Hail, Hail, P O Box 2440, Saudi Arabia. [drmohdadnan@gmail.com](mailto:drmohdadnan@gmail.com) (M.A.)

<sup>8</sup>Clinical Laboratory Science, College of Applied Sciences-Qurayyat, Jouf University, Saudi Arabia. [aeeelasbali@ju.edu.sa](mailto:aeeelasbali@ju.edu.sa) (A.M.E.)

<sup>9</sup>Department of Biomedical Sciences and Therapeutics, Faculty of Medicine & Health Sciences, Uni-versiti Malaysia Sabah, Kota Kinabalu, 44800, Sabah, Malaysia.

<sup>10</sup>Department of Biochemistry, Faculty of Medicine and Health Sciences, Abdurrah University, Pek-anbaru, Riau, Indonesia.

<sup>11</sup>Centre for Excellence in Biomaterials Engineering (CoEBE), AIMST University, 08100 Bedong, Kedah, Malaysia.

\*Correspondence: [pvrao@ums.edu.my](mailto:pvrao@ums.edu.my) (V.R.P.); [mihassan@jmi.ac.in](mailto:mihassan@jmi.ac.in) (M.I.H.)

**Table S1:** Sequence-based analysis of 152 mutations of PARK7 protein.

| S. No. | Mutation Id | Mutation Assessor | SIFT      | PROVEAN     | PON-2      | PolyPhen-2        |
|--------|-------------|-------------------|-----------|-------------|------------|-------------------|
| 1.     | K4E         | High              | Damaging  | Deleterious | Unknown    | Probably Damaging |
| 2.     | K4R         | Medium            | Damaging  | Neutral     | Pathogenic | Possibly Damaging |
| 3.     | A6S         | Medium            | Damaging  | Deleterious | Unknown    | Probably Damaging |
| 4.     | A6V         | Low               | Damaging  | Deleterious | Unknown    | Probably Damaging |
| 5.     | L10M        | Medium            | Damaging  | Neutral     | Unknown    | Probably Damaging |
| 6.     | L10V        | Medium            | Tolerated | Neutral     | Unknown    | Possibly Damaging |
| 7.     | L10P        | High              | Damaging  | Deleterious | Pathogenic | Probably Damaging |
| 8.     | K12E        | Neutral           | Tolerated | Neutral     | Unknown    | Benign            |
| 9.     | G13E        | High              | Damaging  | Deleterious | Pathogenic | Probably Damaging |
| 10.    | A14T        | Low               | Tolerated | Deleterious | Pathogenic | Benign            |
| 11.    | E16G        | High              | Damaging  | Deleterious | Unknown    | Probably Damaging |
| 12.    | M17L        | Medium            | Tolerated | Deleterious | Unknown    | Benign            |
| 13.    | M17V        | Low               | Damaging  | Deleterious | Unknown    | Possibly Damaging |
| 14.    | M17I        | Low               | Tolerated | Deleterious | Unknown    | Benign            |
| 15.    | E18K        | High              | Damaging  | Deleterious | Unknown    | Probably Damaging |
| 16.    | E18D        | High              | Damaging  | Deleterious | Unknown    | Probably Damaging |
| 17.    | T19M        | Medium            | Tolerated | Neutral     | Pathogenic | Probably Damaging |
| 18.    | V20A        | Medium            | Damaging  | Deleterious | Pathogenic | Benign            |
| 19.    | V23I        | Neutral           | Tolerated | Neutral     | Unknown    | Benign            |
| 20.    | V25I        | Low               | Tolerated | Neutral     | Unknown    | Benign            |
| 21.    | M26L        | Neutral           | Tolerated | Neutral     | Unknown    | Benign            |
| 22.    | M26I        | Low               | Damaging  | Neutral     | Unknown    | Benign            |
| 23.    | R27K        | Medium            | Damaging  | Deleterious | Pathogenic | Possibly Damaging |
| 24.    | R28Q        | High              | Damaging  | Deleterious | Pathogenic | Probably Damaging |
| 25.    | A29G        | Low               | Tolerated | Neutral     | Unknown    | Benign            |
| 26.    | A29V        | Medium            | Damaging  | Deleterious | Unknown    | Probably Damaging |
| 27.    | T34I        | Low               | Damaging  | Deleterious | Unknown    | Possibly Damaging |
| 28.    | V35I        | Low               | Tolerated | Neutral     | Unknown    | Benign            |
| 29.    | A36E        | High              | Damaging  | Deleterious | Pathogenic | Probably Damaging |
| 30.    | A36V        | Low               | Damaging  | Deleterious | Unknown    | Probably Damaging |
| 31.    | A39T        | Neutral           | Tolerated | Neutral     | Neutral    | Benign            |
| 32.    | A39S        | Neutral           | Tolerated | Neutral     | Unknown    | Benign            |
| 33.    | D42A        | Low               | Tolerated | Deleterious | Unknown    | Benign            |
| 34.    | D42V        | Low               | Tolerated | Deleterious | Unknown    | Benign            |
| 35.    | D42E        | Neutral           | Tolerated | Neutral     | Neutral    | Benign            |
| 36.    | V44A        | Medium            | Damaging  | Deleterious | Pathogenic | Probably Damaging |
| 37.    | Q45H        | Low               | Tolerated | Neutral     | Unknown    | Benign            |
| 38.    | C46R        | Medium            | Damaging  | Deleterious | Pathogenic | Probably Damaging |
| 39.    | S47G        | Medium            | Damaging  | Deleterious | Pathogenic | Probably Damaging |
| 40.    | R48G        | Medium            | Damaging  | Deleterious | Pathogenic | Probably Damaging |
| 41.    | R48C        | Medium            | Damaging  | Deleterious | Pathogenic | Probably Damaging |
| 42.    | R48H        | Low               | Damaging  | Deleterious | Pathogenic | Probably Damaging |
| 43.    | V51G        | Medium            | Tolerated | Deleterious | Unknown    | Benign            |

|     |       |         |           |             |            |                   |
|-----|-------|---------|-----------|-------------|------------|-------------------|
| 44. | I52V  | Low     | Tolerated | Neutral     | Unknown    | Benign            |
| 45. | C53F  | Medium  | Tolerated | Deleterious | Unknown    | Possibly Damaging |
| 46. | C53W  | Medium  | Damaging  | Deleterious | Unknown    | Probably Damaging |
| 47. | P54S  | Medium  | Damaging  | Deleterious | Pathogenic | Probably Damaging |
| 48. | P54H  | Medium  | Damaging  | Deleterious | Pathogenic | Benign            |
| 49. | A56T  | Neutral | Tolerated | Neutral     | Unknown    | Benign            |
| 50. | S57T  | Low     | Tolerated | Neutral     | Unknown    | Benign            |
| 51. | S57I  | Medium  | Damaging  | Deleterious | Pathogenic | Benign            |
| 52. | E59D  | Neutral | Tolerated | Neutral     | Unknown    | Benign            |
| 53. | A61T  | Medium  | Damaging  | Deleterious | Pathogenic | Possibly Damaging |
| 54. | A61E  | Medium  | Damaging  | Deleterious | Pathogenic | Probably Damaging |
| 55. | A61V  | Low     | Tolerated | Neutral     | Pathogenic | Benign            |
| 56. | K63R  | Low     | Tolerated | Neutral     | Unknown    | Benign            |
| 57. | P66Q  | Low     | Tolerated | Neutral     | Pathogenic | Benign            |
| 58. | D68H  | High    | Damaging  | Deleterious | Pathogenic | Probably Damaging |
| 59. | D68G  | High    | Damaging  | Deleterious | Unknown    | Probably Damaging |
| 60. | D68V  | High    | Damaging  | Deleterious | Pathogenic | Probably Damaging |
| 61. | V69M  | Low     | Damaging  | Neutral     | Pathogenic | Possibly Damaging |
| 62. | V70M  | Medium  | Damaging  | Deleterious | Unknown    | Probably Damaging |
| 63. | P73L  | High    | Damaging  | Deleterious | Pathogenic | Probably Damaging |
| 64. | G75S  | High    | Damaging  | Deleterious | Pathogenic | Probably Damaging |
| 65. | N76D  | Medium  | Tolerated | Neutral     | Unknown    | Benign            |
| 66. | L77M  | Medium  | Tolerated | Neutral     | Unknown    | Possibly Damaging |
| 67. | L77R  | Low     | Tolerated | Neutral     | Pathogenic | Benign            |
| 68. | G78S  | Medium  | Damaging  | Deleterious | Pathogenic | Probably Damaging |
| 69. | A79T  | Low     | Damaging  | Neutral     | Pathogenic | Probably Damaging |
| 70. | A79S  | Low     | Tolerated | Neutral     | Unknown    | Possibly Damaging |
| 71. | A79V  | Medium  | Damaging  | Deleterious | Unknown    | Probably Damaging |
| 72. | N81S  | Medium  | Tolerated | Neutral     | Unknown    | Benign            |
| 73. | S83F  | Medium  | Damaging  | Deleterious | Unknown    | Probably Damaging |
| 74. | A87V  | Neutral | Tolerated | Neutral     | Unknown    | Benign            |
| 75. | V88M  | Medium  | Damaging  | Deleterious | Unknown    | Possibly Damaging |
| 76. | I91T  | Low     | Damaging  | Deleterious | Unknown    | Possibly Damaging |
| 77. | R98W  | Medium  | Damaging  | Deleterious | Unknown    | Benign            |
| 78. | R98Q  | Neutral | Tolerated | Neutral     | Unknown    | Benign            |
| 79. | G100S | Low     | Tolerated | Neutral     | Unknown    | Benign            |
| 80. | G100D | Medium  | Damaging  | Neutral     | Pathogenic | Possibly Damaging |
| 81. | G100A | Medium  | Tolerated | Neutral     | Unknown    | Benign            |
| 82. | G100V | Medium  | Damaging  | Deleterious | Unknown    | Possibly Damaging |
| 83. | L101V | Medium  | Tolerated | Neutral     | Unknown    | Benign            |
| 84. | A104T | High    | Damaging  | Deleterious | Pathogenic | Probably Damaging |
| 85. | A104S | Medium  | Damaging  | Deleterious | Unknown    | Possibly Damaging |
| 86. | A107T | High    | Damaging  | Deleterious | Pathogenic | Probably Damaging |
| 87. | A107P | High    | Damaging  | Deleterious | Pathogenic | Probably Damaging |
| 88. | A107S | Medium  | Damaging  | Deleterious | Unknown    | Probably Damaging |
| 89. | T110A | Low     | Damaging  | Deleterious | Unknown    | Benign            |

|      |       |         |           |             |            |                   |
|------|-------|---------|-----------|-------------|------------|-------------------|
| 90.  | T110S | Low     | Damaging  | Deleterious | Unknown    | Possibly Damaging |
| 91.  | T110I | Low     | Tolerated | Deleterious | Unknown    | Possibly Damaging |
| 92.  | L112P | High    | Damaging  | Deleterious | Unknown    | Probably Damaging |
| 93.  | A114V | Medium  | Damaging  | Deleterious | Unknown    | Benign            |
| 94.  | H115D | High    | Damaging  | Deleterious | Pathogenic | Probably Damaging |
| 95.  | H115R | Medium  | Damaging  | Deleterious | Pathogenic | Probably Damaging |
| 96.  | E116K | Neutral | Tolerated | Neutral     | Unknown    | Benign            |
| 97.  | T124R | High    | Damaging  | Deleterious | Unknown    | Probably Damaging |
| 98.  | T125I | Low     | Damaging  | Deleterious | Unknown    | Probably Damaging |
| 99.  | P127A | Medium  | Damaging  | Deleterious | Unknown    | Probably Damaging |
| 100. | P127S | Medium  | Damaging  | Deleterious | Unknown    | Probably Damaging |
| 101. | P127R | High    | Damaging  | Deleterious | Pathogenic | Probably Damaging |
| 102. | L128F | Low     | Damaging  | Neutral     | Unknown    | Benign            |
| 103. | L128P | Low     | Tolerated | Neutral     | Pathogenic | Benign            |
| 104. | K130T | Medium  | Damaging  | Deleterious | Pathogenic | Probably Damaging |
| 105. | K132E | Low     | Tolerated | Neutral     | Unknown    | Benign            |
| 106. | M133I | Neutral | Tolerated | Neutral     | Unknown    | Benign            |
| 107. | M134V | Neutral | Tolerated | Neutral     | Unknown    | Benign            |
| 108. | N135D | Neutral | Tolerated | Neutral     | Unknown    | Benign            |
| 109. | H138R | Medium  | Tolerated | Neutral     | Pathogenic | Possibly Damaging |
| 110. | T140A | Low     | Tolerated | Neutral     | Unknown    | Benign            |
| 111. | T140S | Low     | Tolerated | Neutral     | Neutral    | Benign            |
| 112. | N144S | Neutral | Tolerated | Neutral     | Unknown    | Benign            |
| 113. | N144K | Neutral | Damaging  | Neutral     | Unknown    | Benign            |
| 114. | R145S | Medium  | Tolerated | Deleterious | Pathogenic | Possibly Damaging |
| 115. | R145C | High    | Damaging  | Deleterious | Pathogenic | Probably Damaging |
| 116. | R145H | High    | Damaging  | Deleterious | Pathogenic | Possibly Damaging |
| 117. | R145P | Medium  | Damaging  | Deleterious | Pathogenic | Benign            |
| 118. | V146M | High    | Damaging  | Deleterious | Pathogenic | Probably Damaging |
| 119. | V146G | High    | Damaging  | Deleterious | Unknown    | Probably Damaging |
| 120. | K148T | Low     | Tolerated | Neutral     | Unknown    | Benign            |
| 121. | D149A | High    | Damaging  | Deleterious | Unknown    | Probably Damaging |
| 122. | G150S | Medium  | Damaging  | Deleterious | Pathogenic | Possibly Damaging |
| 123. | G150D | Medium  | Tolerated | Deleterious | Pathogenic | Benign            |
| 124. | T154A | High    | Damaging  | Deleterious | Pathogenic | Probably Damaging |
| 125. | T154R | High    | Damaging  | Deleterious | Pathogenic | Probably Damaging |
| 126. | R156W | High    | Damaging  | Deleterious | Pathogenic | Probably Damaging |
| 127. | R156Q | Low     | Tolerated | Deleterious | Pathogenic | Possibly Damaging |
| 128. | G157R | High    | Damaging  | Deleterious | Pathogenic | Probably Damaging |
| 129. | G157A | Medium  | Damaging  | Deleterious | Pathogenic | Probably Damaging |
| 130. | P158S | Medium  | Damaging  | Deleterious | Pathogenic | Probably Damaging |
| 131. | G159E | High    | Damaging  | Deleterious | Pathogenic | Probably Damaging |
| 132. | T160S | Medium  | Damaging  | Deleterious | Unknown    | Probably Damaging |
| 133. | E163K | Medium  | Tolerated | Deleterious | Unknown    | Benign            |
| 134. | F164L | Medium  | Damaging  | Deleterious | Pathogenic | Probably Damaging |
| 135. | A165V | Medium  | Damaging  | Deleterious | Unknown    | Probably Damaging |

|      |       |         |           |             |            |                   |
|------|-------|---------|-----------|-------------|------------|-------------------|
| 136. | L166P | High    | Damaging  | Deleterious | Pathogenic | Probably Damaging |
| 137. | A167T | Low     | Tolerated | Neutral     | Neutral    | Benign            |
| 138. | A167G | Medium  | Tolerated | Neutral     | Neutral    | Possibly Damaging |
| 139. | A167V | Medium  | Tolerated | Neutral     | Unknown    | Benign            |
| 140. | I168V | Medium  | Tolerated | Neutral     | Unknown    | Possibly Damaging |
| 141. | A171S | Low     | Tolerated | Neutral     | Neutral    | Benign            |
| 142. | L172Q | High    | Damaging  | Deleterious | Pathogenic | Probably Damaging |
| 143. | K175E | Low     | Tolerated | Neutral     | Unknown    | Benign            |
| 144. | E176A | Low     | Tolerated | Deleterious | Unknown    | Benign            |
| 145. | A178V | Low     | Tolerated | Neutral     | Unknown    | Benign            |
| 146. | A179V | Low     | Tolerated | Neutral     | Neutral    | Benign            |
| 147. | Q180E | Neutral | Tolerated | Neutral     | Unknown    | Benign            |
| 148. | V181M | Medium  | Damaging  | Neutral     | Unknown    | Probably Damaging |
| 149. | V181L | Low     | Tolerated | Neutral     | Unknown    | Benign            |
| 150. | L185F | Medium  | Damaging  | Neutral     | Unknown    | Possibly Damaging |
| 151. | K188E | Medium  | Tolerated | Neutral     | Unknown    | Benign            |
| 152. | D189G | Low     | Damaging  | Neutral     | Unknown    | Possibly Damaging |

**Table S2:** Structure-based analysis of 76 mutations of PARK7 protein.

| S. No. | Mutation | SDM2     | mCSM     | Mupro    |
|--------|----------|----------|----------|----------|
|        |          | Outcome  | Outcome  | Outcome  |
| 1.     | K4E      | Increase | Increase | Decrease |
| 2.     | K4R      | Increase | Decrease | Decrease |
| 3.     | A6S      | Decrease | Decrease | Decrease |
| 4.     | A6V      | Increase | Decrease | Decrease |
| 5.     | L10M     | Decrease | Decrease | Decrease |
| 6.     | L10P     | Decrease | Decrease | Decrease |
| 7.     | G13E     | Decrease | Decrease | Decrease |
| 8.     | E16G     | Decrease | Decrease | Decrease |
| 9.     | M17V     | Decrease | Decrease | Decrease |
| 10.    | E18K     | Decrease | Decrease | Decrease |
| 11.    | E18D     | Decrease | Decrease | Decrease |
| 12.    | T19M     | Increase | Decrease | Decrease |
| 13.    | V20A     | Increase | Decrease | Decrease |
| 14.    | R27K     | Decrease | Decrease | Decrease |
| 15.    | R28Q     | Increase | Decrease | Decrease |
| 16.    | A29V     | Decrease | Decrease | Decrease |
| 17.    | T34I     | Increase | Decrease | Decrease |
| 18.    | A36E     | Decrease | Decrease | Decrease |
| 19.    | A36V     | Increase | Decrease | Increase |
| 20.    | V44A     | Decrease | Decrease | Decrease |
| 21.    | C46R     | Decrease | Decrease | Decrease |
| 22.    | S47G     | Increase | Decrease | Decrease |
| 23.    | R48G     | Decrease | Decrease | Decrease |
| 24.    | R48C     | Increase | Decrease | Decrease |
| 25.    | R48H     | Increase | Decrease | Decrease |

|     |       |          |          |          |
|-----|-------|----------|----------|----------|
| 26. | C53F  | Decrease | Decrease | Decrease |
| 27. | C53W  | Increase | Decrease | Decrease |
| 28. | P54S  | Decrease | Decrease | Decrease |
| 29. | P54H  | Decrease | Decrease | Decrease |
| 30. | S57I  | Decrease | Decrease | Decrease |
| 31. | A61T  | Decrease | Decrease | Decrease |
| 32. | A61E  | Decrease | Decrease | Decrease |
| 33. | D68H  | Decrease | Decrease | Decrease |
| 34. | D68G  | Decrease | Decrease | Decrease |
| 35. | D68V  | Decrease | Increase | Decrease |
| 36. | V70M  | Decrease | Decrease | Decrease |
| 37. | P73L  | Increase | Decrease | Increase |
| 38. | G75S  | Decrease | Decrease | Decrease |
| 39. | G78S  | Decrease | Decrease | Decrease |
| 40. | V88M  | Decrease | Decrease | Decrease |
| 41. | R98W  | Decrease | Decrease | Decrease |
| 42. | G100D | Decrease | Decrease | Decrease |
| 43. | G100V | Increase | Decrease | Decrease |
| 44. | A104T | Decrease | Decrease | Decrease |
| 45. | A104S | Decrease | Decrease | Decrease |
| 46. | A107T | Decrease | Decrease | Decrease |
| 47. | A107P | Decrease | Decrease | Decrease |
| 48. | A107S | Decrease | Decrease | Decrease |
| 49. | L112P | Decrease | Decrease | Decrease |
| 50. | H115D | Decrease | Decrease | Decrease |
| 51. | H115R | Decrease | Decrease | Decrease |
| 52. | T124R | Decrease | Decrease | Decrease |
| 53. | P127A | Increase | Decrease | Decrease |
| 54. | P127S | Increase | Decrease | Decrease |
| 55. | P127R | Increase | Decrease | Decrease |
| 56. | K130T | Decrease | Decrease | Decrease |
| 57. | R145S | Decrease | Decrease | Decrease |
| 58. | R145C | Decrease | Decrease | Decrease |
| 59. | R145H | Increase | Decrease | Decrease |
| 60. | R145P | Decrease | Decrease | Decrease |
| 61. | V146M | Decrease | Decrease | Decrease |
| 62. | V146G | Decrease | Decrease | Decrease |
| 63. | D149A | Increase | Decrease | Decrease |
| 64. | G150S | Decrease | Decrease | Decrease |
| 65. | G150D | Decrease | Decrease | Decrease |
| 66. | T154A | Decrease | Decrease | Decrease |
| 67. | T154R | Decrease | Decrease | Decrease |
| 68. | R156W | Increase | Decrease | Decrease |
| 69. | G157A | Decrease | Decrease | Decrease |
| 70. | P158S | Increase | Decrease | Decrease |
| 71. | G159E | Increase | Decrease | Increase |
| 72. | T160S | Decrease | Decrease | Decrease |
| 73. | F164L | Decrease | Decrease | Decrease |
| 74. | A165V | Decrease | Increase | Decrease |

|     |       |          |          |          |
|-----|-------|----------|----------|----------|
| 75. | L166P | Decrease | Decrease | Decrease |
| 76. | L172Q | Decrease | Decrease | Decrease |
